# Supplementary material for: Synthesis of nitrogen-rich and thermostable energetic materials based on hetarenecarboxylic acids
Source: Royal Society of Chemistry journal article supplement (doi:10.1039/d1dt02854e), 2021-01-01
Supplement: d1dt02854e1.pdf [file d1dt02854e1.pdf]

**Supporting information (SI)**

**Synthesis of nitrogen-rich and thermostable energetic  
materials based on hetarenecarboxylic acids**

Caijin Lei<sup>a</sup>, Hongwei Yang<sup>\*a</sup>, Qinghua Zhang<sup>b</sup> and Guangbin Cheng<sup>\*a</sup>

*School of Chemistry and Chemical Engineering, Nanjing University of Science and Technology,  
Xiaolingwei 200, Nanjing, Jiangsu, China. Fax: (+) 86 25 8430 3286*

E-mail: [hyang@mail.njust.edu.cn](mailto:hyang@mail.njust.edu.cn) (H. Yang); [gcheng@mail.njust.edu.cn](mailto:gcheng@mail.njust.edu.cn) (G. Cheng)

## Table of Content

|                                                                        |    |
|------------------------------------------------------------------------|----|
| 1. Computational details .....                                         | 2  |
| 2. The crystallographic data .....                                     | 4  |
| 3. $^1\text{H}$ and $^{13}\text{C}$ NMR spectra of new compounds ..... | 12 |

# 1. Computational details

The calculation was performed by using the Gaussian 09 program package<sup>1</sup>. The geometric optimization of all the structures and frequency analyses for calculation of heats of formation was carried out by using B3-LYP functional<sup>2</sup> with 6-311+G\*\* basis set<sup>3,4</sup>. All of the optimized structures were characterized to be local energy minima on the potential surface without any imaginary frequencies. The heats of formation (HOF) of these compounds were computed through appropriate isodesmic reactions (Scheme S1). Atomization energies were calculated by the CBS-4M<sup>5</sup>. Total energy and heat of formation for the reference compounds are summarized in Table S11. All the optimized structures were characterized to be true local energy minima on the potential-energy surface without imaginary frequencies.

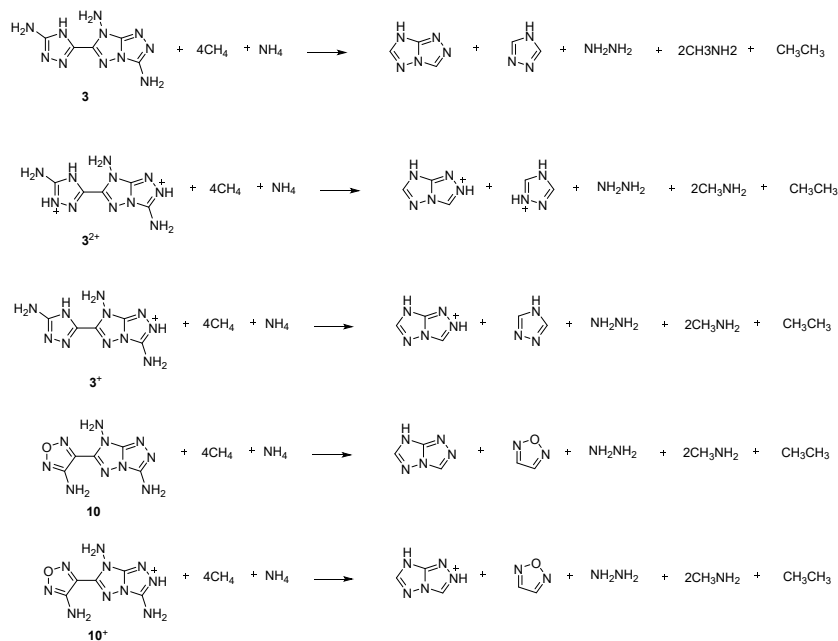

**Scheme S1** Isodesmic and tautomeric reactions to compute the HOF.

**Table S1** Total energy and heat of formation for the reference compounds

|                                 | $E_0^a$ /a.u. | ZPE <sup>b</sup> / kJ·mol <sup>-1</sup> | $\Delta H_T^c$ / kJ mol <sup>-1</sup> | HOF <sup>d</sup> / kJ mol <sup>-1</sup> |
|---------------------------------|---------------|-----------------------------------------|---------------------------------------|-----------------------------------------|
| <b>3</b>                        | -797.1001102  | 419.07                                  | 38.61                                 | 769.5                                   |
| <b>3 cation<sup>+</sup></b>     | -797.5007581  | 448.33                                  | 41.61                                 | 1283.2                                  |
| <b>3 cation<sup>2+</sup></b>    | -798.5648624  | 478.65                                  | 40.23                                 | 2112.1                                  |
| <b>10</b>                       | -816.9084255  | 384.06                                  | 39                                    | 820.3                                   |
| <b>10 cation<sup>+</sup></b>    | -817.2945799  | 415.46                                  | 40.62                                 | 1372.8                                  |
| CH <sub>3</sub> NH <sub>2</sub> | -95.89384     | 160.78                                  | 11.64                                 | -22.5                                   |
| NH <sub>2</sub> NH <sub>2</sub> | -111.9105763  | 134.28                                  | 11.16                                 | 95.4                                    |
| CH <sub>3</sub> CH <sub>3</sub> | -79.8565413   | 187.31                                  | 11.79                                 | -84.0                                   |

<sup>a</sup>  $E_0$  in a.u. ZPE (vibrational zero-point energy),  $\Delta H_T$  (thermal correction to enthalpy) and HOF are in kJ mol<sup>-1</sup>. <sup>b</sup>Data are from Ref. [D. R. Lide, ed., CRC Handbook of Chemistry and Physics, 88th Edition (Internet Version 2008), CRC Press/Taylor and Francis, Boca Raton, FL.].

<sup>c</sup>Data obtained from CBS-4M calculation in combination with the atomization reaction of the corresponding compound. <sup>d</sup>Data from Ref. [N. Fischer, T. M. Klapötke and J. Stierstorfer, *Z. Anorg. Allg. Chem.*, 2009, 635, 271.]

## References

- (1) M. J. Frisch, G. W. Trucks, H. B. Schlegel, G. E. Scuseria, M. A. Robb, J. R. Cheeseman, V. G. Zakrzewski, J. A. Montgomery, R. E. Stratmann, J. C. Burant, S. Dapprich, J. M. Millam, A. D. Daniels, K. N. Kudin, M. C. Strain, O. Farkas, J. Tomasi, V. Barone, M. Cossi, R. Cammi, B. Mennucci, C. Pomelli, C. Adamo, S. Clifford, J. Ochterski, G. A. Petersson, P. Y. Ayala, Q. Cui, K. Morokuma, D. K. Malick, A. D. Rabuck, K. Raghavachari, J. B. Foresman, J. Cioslowski, J. V. Ortiz, A. G. Baboul, B. B. Stefanov, G. Liu, A. Liashenko, P. Piskorz, I. Komaromi, R. Gomperts, R. L. Martin, D. J. Fox, T. Keith, M. A. Laham, C. Y. Peng, A. Nanayakkara, C. Gonzalez, M. Challacombe, P. M. W. Gill, B. Johnson, W. Chen, M. W. Wong, J. L. Andres, C. Gonzalez, M. Head-Gordon, E. S. Replogle and J. A. Pople. Gaussian 09, revision A. 01; Gaussian, Inc.: Wallingford, CT, 2009.
- (2) A. D. Becke, *J. Phys. Chem.* 1993, **98**, 5648.
- (3) P. J. Stephens, F. J. Devlin, C. F. Chabalowski, M. J. Frisch, *J. Phys. Chem.* 1994, **98**, 11623.
- (4) P. C. Hariharan, J. A. Pople. *Theoretica Chimica Acta.* 1973, **28**, 213.
- (5) J. W. Ochterski, G. A. Petersson, J. A. Montgomery, *J. Chem. Phys.* 1996, **104**, 2598.

## 2. The crystallographic data

### Experimental section

**Caution!** Although we experienced no explosion in handling these energetic materials, the use of small scale and best safety practices (leather gloves, face shield) are strongly encouraged!

### General methods

<sup>1</sup>H and <sup>13</sup>C NMR spectra are recorded on a 500 MHz (Bruker AVANCE 500) NMR spectrometer operating at 500 and 125 MHz, respectively. The decomposition points are obtained on a differential scanning calorimeter at a heating rate of 5 °C min<sup>-1</sup>. IR spectra are recorded on a FT-IR spectrometer (Thermo Nicolet AVATAR 370) as thin films by using KBr plates. Densities are determined at 25 °C by employing a Micromeritics AccuPyc II 1340 gas pycnometer. Elemental analyses were carried out by using a Vario Micro cube Elementar Analyser. Impact and friction sensitivity measurements are made by using a standard BAM Fall hammer and a BAM friction tester. Detonation velocity and detonation pressure data are calculated by program package EXPLOS (version 6.02).

### X-ray crystallography

The data for **4**•H<sub>2</sub>O, **7** and **11**•H<sub>2</sub>O were collected with a Bruker SMART APEX II CCD diffractometer with graphite-monochromated Mo-Kα radiation (λ=0.071073 nm) at 160 K or 170 K. The data collection and the initial unit cell refinement are performed by using APEX2 (v2010.3-0). Data Reduction is performed by using SAINT (v7.68A) and XPREP (v2008/2). Empirical absorption corrections are applied by using the SADABS (v2008/1) program. The structures are solved by direct methods and refined by the full matrix least-squares based on F<sup>2</sup> using SHELXTL--2014/7 (Sheldrick, 2014) programme package. All non-hydrogen atoms were refined anisotropically. The hydrogen atoms attached to ligands are included using a riding model. The crystallographic data and CCDC numbers for these compounds are summarized in Table S2

**Table S2** Crystallographic Data for **4**•H<sub>2</sub>O, **7** and **11**•H<sub>2</sub>O

|                                             | <b>4•H<sub>2</sub>O</b>                                          | <b>7</b>                                                         | <b>11•H<sub>2</sub>O</b>                                         |
|---------------------------------------------|------------------------------------------------------------------|------------------------------------------------------------------|------------------------------------------------------------------|
| Empirical formula                           | C <sub>5</sub> H <sub>11</sub> N <sub>13</sub> O <sub>7</sub>    | C <sub>5</sub> H <sub>6</sub> N <sub>10</sub> O                  | C <sub>5</sub> H <sub>9</sub> N <sub>11</sub> O <sub>5</sub>     |
| Formula weight                              | 365.27                                                           | 220.20                                                           | 303.23                                                           |
| Temperature/K                               | 160                                                              | 170.0                                                            | 160                                                              |
| Crystal system                              | triclinic                                                        | triclinic                                                        | monoclinic                                                       |
| Space group                                 | P-1                                                              | P-1                                                              | P2 <sub>1</sub> /c                                               |
| a/Å                                         | 6.5824(11)                                                       | 6.8113(9)                                                        | 7.0384(3)                                                        |
| b/Å                                         | 9.6308(11)                                                       | 8.2072(10)                                                       | 13.0429(6)                                                       |
| c/Å                                         | 11.1986(16)                                                      | 8.5119(12)                                                       | 12.7579(6)                                                       |
| α/°                                         | 77.516(4)                                                        | 108.619(5)                                                       | 90                                                               |
| β/°                                         | 75.288(4)                                                        | 109.314(5)                                                       | 104.682(2)                                                       |
| γ/°                                         | 89.243(3)                                                        | 92.750(5)                                                        | 90                                                               |
| Volume/Å <sup>3</sup>                       | 669.76(17)                                                       | 419.23(10)                                                       | 1132.95(9)                                                       |
| Z                                           | 2                                                                | 2                                                                | 4                                                                |
| ρ <sub>calc</sub> g/cm <sup>3</sup>         | 1.811                                                            | 1.760                                                            | 1.778                                                            |
| μ/mm <sup>-1</sup>                          | 0.163                                                            | 0.138                                                            | 0.156                                                            |
| F(000)                                      | 376                                                              | 228.0                                                            | 624.0                                                            |
| Crystal size/mm <sup>3</sup>                | 0.04 x 0.09 x 0.16                                               | 0.15 × 0.08 × 0.05                                               | 0.17 × 0.11 × 0.06                                               |
| Radiation                                   | MoKα (λ=0.71073)                                                 | MoKα (λ = 0.71073)                                               | MoKα (λ = 0.71073)                                               |
| 2θ range for data collection/°              | 3.854 to 52.89                                                   | 5.316 to 52.842                                                  | 4.544 to 55.078                                                  |
| Index ranges                                | -8≤h≤8, -12≤k≤12,<br>-14≤l≤13                                    | -8≤h≤8, -10≤k≤10,<br>-10≤l≤10                                    | -9≤h≤8, -16≤k≤16,<br>-16≤l≤16                                    |
| Reflections collected                       | 7581                                                             | 4856                                                             | 12695                                                            |
| Independent reflections                     | 2733 [R <sub>int</sub> = 0.0576,<br>R <sub>sigma</sub> = 0.0762] | 1710 [R <sub>int</sub> = 0.0468,<br>R <sub>sigma</sub> = 0.0580] | 2580 [R <sub>int</sub> = 0.0401,<br>R <sub>sigma</sub> = 0.0321] |
| Data/restraints/parameters                  | 2733/1/241                                                       | 1710/0/155                                                       | 2580/0/218                                                       |
| Goodness-of-fit on F <sup>2</sup>           | 1.049                                                            | 1.031                                                            | 1.019                                                            |
| Final R indexes [I>=2σ(I)]                  | R <sub>1</sub> = 0.0720,<br>wR <sub>2</sub> = 0.1770             | R <sub>1</sub> = 0.0461,<br>wR <sub>2</sub> = 0.1013             | R <sub>1</sub> = 0.0411,<br>wR <sub>2</sub> = 0.1000             |
| Final R indexes [all data]                  | R <sub>1</sub> = 0.11151,<br>wR <sub>2</sub> = 0.2144            | R <sub>1</sub> = 0.0782,<br>wR <sub>2</sub> = 0.1219             | R <sub>1</sub> = 0.0549,<br>wR <sub>2</sub> = 0.1110             |
| Largest diff. peak/hole / e Å <sup>-3</sup> | 0.61/-0.36                                                       | 0.25/-0.25                                                       | 0.35/-0.27                                                       |
| CCDC                                        | 2078516                                                          | 2078515                                                          | 2078514                                                          |

**Table S3** Bond distance of compound **4•H<sub>2</sub>O**

| parameter | Å        | parameter | Å        |
|-----------|----------|-----------|----------|
| O2-N13    | 1.268(5) | N6 -C2    | 1.370(5) |
| O3-N13    | 1.246(5) | N8-C4     | 1.376(5) |

|         |          |          |          |
|---------|----------|----------|----------|
| O4 -N13 | 1.239(5) | N8-C5    | 1.361(5) |
| O5-N12  | 1.251(5) | N9-N10   | 1.375(4) |
| O6-N12  | 1.246(5) | N9 -C4   | 1.296(5) |
| O7 -N12 | 1.262(4) | N10-C5   | 1.327(4) |
| O1-H1B  | 0.8700   | N11-C5   | 1.313(5) |
| O1 -H1A | 0.8700   | N2-H2    | 0.95(5)  |
| N1-C2   | 1.285(5) | N3 -H3A  | 0.8800   |
| N1-N2   | 1.407(5) | N3 -H3B  | 0.8800   |
| N2-C1   | 1.332(5) | N7-H7A   | 0.89(4)  |
| N3-C1   | 1.305(5) | N7-H7B   | 0.90(5)  |
| N4-C1   | 1.370(5) | N8-H8    | 0.8800   |
| N4-C2   | 1.364(5) | N10 -H10 | 0.8800   |
| N4-N5   | 1.392(4) | N11-H11B | 0.8800   |
| N5-C3   | 1.323(5) | N11-H11A | 0.8800   |
| N6-N7   | 1.400(5) | C3-C4    | 1.444(6) |
| N6-C3   | 1.377(5) |          |          |

**Table S4** Bond angle of compound **4**•H<sub>2</sub>O

| parameter  | °        | parameter     | °        |
|------------|----------|---------------|----------|
| H1A-O1-H1B | 104.00   | C5-N11-H11A   | 120.00   |
| N2-N1-C2   | 100.5(3) | H11A-N11-H11B | 120.00   |
| N1 -N2 -C1 | 114.7(3) | C5-N11-H11B   | 120.00   |
| N5-N4 -C2  | 114.3(3) | O2-N13-O4     | 120.2(4) |
| C1-N4-C2   | 107.1(3) | O3-N13-O4     | 120.7(3) |
| N5-N4-C1   | 138.3(3) | O2-N13 -O3    | 119.0(3) |
| N4-N5-C3   | 100.8(3) | O5-N12-O7     | 119.6(3) |
| N7-N6-C2   | 129.2(3) | O6 -N12-O7    | 119.9(4) |
| C2-N6-C3   | 106.5(3) | O5-N12-O6     | 120.4(3) |
| N7-N6-C3   | 124.1(3) | N2-C1 -N3     | 130.0(4) |
| C4-N8-C5   | 106.2(3) | N2 -C1-N4     | 103.1(3) |
| N10-N9-C4  | 104.7(3) | N3-C1-N4      | 126.9(4) |
| N9-N10-C5  | 111.5(3) | N4 -C2-N6     | 104.1(3) |
| N1-N2-H2   | 121(3)   | N1-C2-N6      | 141.2(3) |
| C1-N2-H2   | 124(3)   | N1-C2-N4      | 114.7(3) |
| C1-N3-H3B  | 120.00   | N5-C3-C4      | 122.5(3) |
| H3A-N3-H3B | 120.00   | N5-C3 -N6     | 114.4(3) |
| C1-N3-H3A  | 120.00   | N6-C3-C4      | 123.1(3) |
| N6-N7-H7B  | 106(3)   | N8-C4 -N9     | 111.5(3) |
| H7A-N7-H7B | 116(4)   | N8-C4-C3      | 125.4(3) |
| N6-N7-H7A  | 111(3)   | N9 -C4-C3     | 123.0(3) |
| C4-N8-H8   | 127.00   | N8-C5-N10     | 106.1(3) |
| C5-N8-H8   | 127.00   | N8-C5-N11     | 125.3(3) |
| C5-N10-H10 | 124.00   | N10-C5-N11    | 128.6(4) |
| N9-N10-H10 | 124.00   |               |          |

**Table S5** Torsion angles of compound **4**•H<sub>2</sub>O

| parameter      | °         | parameter      | °         |
|----------------|-----------|----------------|-----------|
| C2-N1-N2-C1    | -0.5(4)   | C4 -N8-C5 -N11 | 179.8(4)  |
| N2 -N1-C2 -N4  | 1.4(4)    | C4-N9-N10 -C5  | 0.0(4)    |
| N2 -N1 -C2-N6  | -174.9(5) | N10-N9 -C4-N8  | -0.3(4)   |
| N1-N2-C1 -N3   | 178.7(4)  | N10-N9-C4-C3   | -177.6(4) |
| N1 -N2-C1 -N4  | -0.5(4)   | N9-N10-C5-N8   | 0.2(4)    |
| C1-N4-N5 -C3   | -172.7(5) | N9 -N10-C5-N11 | -179.9(4) |
| C2-N4-N5-C3    | -1.1(4)   | N5-C3-C4-N8    | -165.6(4) |
| N5-N4-C1-N2    | 173.2(4)  | N5-C3-C4 -N9   | 11.3(6)   |
| N5-N4-C1-N3    | -6.0(8)   | N6-C3-C4-N8    | 13.3(6)   |
| C2-N4-C1-N2    | 1.3(4)    | N6C3-C4-N9     | -169.8(4) |
| C2-N4-C1-N3    | -178.0(4) | N7 -N6-C3 -N5  | 176.1(4)  |
| N5 -N4-C2 -N1  | -176.0(3) | N7-N6 -C3 -C4  | -3.0(6)   |
| N5-N4-C2 -N6   | 1.7(4)    | C2-N6-C3 -N5   | 0.9(5)    |
| C1 -N4-C2 -N1  | -1.8(5)   | C2-N6-C3-C4    | -178.1(4) |
| C1-N4-C2-N6    | 175.8(3)  | C5-N8-C4-N9    | 0.4(5)    |
| N4-N5-C3 -N6   | 0.1(4)    | C5-N8-C4 -C3   | 177.6(4)  |
| N4-N5-C3-C4    | 179.1(4)  | C4 -N8-C5-N10  | -0.3(4)   |
| N7 -N6 -C2 -N1 | 0.2(8)    | C3-N6-C2 -N1   | 175.1(5)  |
| N7-N6-C2 -N4   | -176.3(4) | C3-N6 -C2 -N4  | -1.5(4)   |

**Table S6** Hydrogen bonds of compound **4**•H<sub>2</sub>O

| D-H...A       | d(D-H)/Å | d(H...A)/ Å | d(D...A)/ Å | <(DHA)/ ° |
|---------------|----------|-------------|-------------|-----------|
| O1-H1A... N9  | 0.8700   | 2.0700      | 2.914(5)    | 165.00    |
| O1- H1B... O2 | 0.8700   | 1.9000      | 2.769(4)    | 173.00    |
| O1-H1B...O3   | 0.8700   | 2.5700      | 3.095(4)    | 119.00    |
| N2- H2...O6   | 0.95(5)  | 2.50(4)     | 3.063(5)    | 118(3)    |
| N2-H2...O7    | 0.95(5)  | 1.94(5)     | 2.884(5)    | 174(3)    |
| N3-H3A...O5   | 0.8800   | 2.4000      | 2.947(5)    | 121.00    |
| N3-H3A...O7   | 0.8800   | 2.1700      | 3.043(5)    | 174.00    |
| N3-H3B...O2   | 0.8800   | 2.0300      | 2.905(5)    | 173.00    |
| N7-H7A...N1   | 0.89(4)  | 2.30(4)     | 3.038(5)    | 141(3)    |
| N7-H7B...O3   | 0.90(5)  | 2.60(5)     | 3.285(5)    | 134(4)    |
| N7- H7B... O3 | 0.90(5)  | 2.24(5)     | 2.960(5)    | 137(4)    |
| N8-H8...O6    | 0.8800   | 2.0700      | 2.904(5)    | 158.00    |

|                |        |        |          |        |
|----------------|--------|--------|----------|--------|
| N8 - H8...N7   | 0.8800 | 2.2800 | 2.809(5) | 119.00 |
| N10-H10...O1   | 0.8800 | 1.7600 | 2.619(4) | 164.00 |
| N11-H11A... O3 | 0.8800 | 2.1500 | 3.000(4) | 163.00 |
| N11- H11A...O4 | 0.8800 | 2.5300 | 2.835(4) | 101.00 |
| N11-H11B...O5  | 0.8800 | 1.9800 | 2.858(4) | 177.00 |
| N11-H11B...O4  | 0.8800 | 2.5200 | 2.835(4) | 102.00 |

**Table S7** Bond distances of compound **7**

| parameter | Å        | parameter | Å        |
|-----------|----------|-----------|----------|
| O1-N1     | 1.404(3) | N7-N8     | 1.431(3) |
| O1-N3     | 1.363(3) | N7-C4     | 1.303(3) |
| N1-C1     | 1.309(3) | N8-C5     | 1.320(3) |
| N2-C1     | 1.361(3) | N9-C5     | 1.373(3) |
| N3-C2     | 1.306(3) | N2-H2B    | 0.89(3)  |
| N4-N5     | 1.388(2) | N2-H2A    | 0.90(3)  |
| N4-C3     | 1.316(3) | N9-H9A    | 0.8800   |
| N5-C4     | 1.350(3) | N9-H9B    | 0.8800   |
| N5-C5     | 1.376(3) | N10 -H10B | 0.8800   |
| N6-N10    | 1.398(3) | N10-H10A  | 0.8800   |
| N6-C3     | 1.386(3) | C1-C2     | 1.433(3) |
| N6-C4     | 1.370(3) | C2-C3     | 1.454(3) |

**Table S8** Bond angles of compound **7**

| parameter  | °          | parameter     | °          |
|------------|------------|---------------|------------|
| N1-O1-N3   | 111.09(19) | N6-N10-H10A   | 109.00     |
| O1-N1-C1   | 105.3(2)   | N6-N10-H10B   | 109.00     |
| O1-N3-C2   | 105.8(2)   | H10A-N10-H10B | 109.00     |
| N5 -N4 -C3 | 101.96(19) | N1-C1-C2      | 108.3(2)   |
| N4-N5 -C4  | 113.41(19) | N2-C1-C2      | 128.0(2)   |
| N4-N5-C5   | 141.0(2)   | N1 -C1-N2     | 123.6(2)   |
| C4-N5-C5   | 105.57(18) | N3-C2 -C1     | 109.6(2)   |
| N10-N6-C3  | 131.50(19) | C1-C2 -C3     | 127.0(2)   |
| N10-N6-C4  | 122.64(19) | N3-C2-C3      | 123.4(2)   |
| C3-N6-C4   | 105.73(19) | N4-C3-N6      | 113.7(2)   |
| N8-N7-C4   | 102.98(18) | N6-C3-C2      | 124.5(2)   |
| N7-N8-C5   | 109.78(17) | N4-C3 -C2     | 121.8(2)   |
| C1-N2-H2A  | 114.6(19)  | N5-C4-N7      | 113.9(2)   |
| C1 -N2-H2B | 114.7(19)  | N6-C4-N7      | 140.8(2)   |
| H2A-N2-H2B | 115(3)     | N5-C4-N6      | 105.25(19) |
| C5-N9-H9A  | 109.00     | N8 -C5 -N9    | 128.1(2)   |
| C5-N9-H9B  | 110.00     | N5-C5 -N8     | 107.76(19) |



|            |        |          |          |
|------------|--------|----------|----------|
| H9A-N9-H9B | 109.00 | N5-C5-N9 | 123.9(2) |
|------------|--------|----------|----------|

**Table S9** Torsion angles of compound **7**

| parameter    | Å           | parameter    | Å          |
|--------------|-------------|--------------|------------|
| N3-O1-N1-C1  | 0.5(3)      | N8-N7-C4-N6  | 177.6(3)   |
| N1-O1-N3-C2  | -0.4(2)     | N7-N8-C5-N5  | 0.1(2)     |
| O1-N1-C1-N2  | -177.3(2)   | N7-N8-C5-N9  | -174.0(2)  |
| O1-N1-C1-C2  | -0.4(3)     | N1-C1-C2-N3  | 0.2(3)     |
| O1-N3-C2-C1  | 0.2(3)      | N1-C1-C2-C3  | -178.9(2)  |
| O1-N3-C2-C3  | 179.3(2)    | N2-C1-C2-N3  | 176.9(2)   |
| C3-N4-N5-C4  | 0.4(2)      | N2-C1-C2-C3  | -2.2(4)    |
| C3-N4-N5-C5  | 177.9(3)    | N3-C2-C3-N4  | -175.1(2)  |
| N5-N4-C3-N6  | -0.3(2)     | N3-C2-C3-N6  | 4.9(4)     |
| N5-N4-C3-C2  | 179.6(2)    | C1-C2-C3-N4  | 3.9(4)     |
| N4-N5-C4-N6  | -0.4(2)     | C1-C2-C3-N6  | -176.2(2)  |
| N4-N5-C4-N7  | 177.57(18)  | C4-N6-C3-C2  | -179.8(2)  |
| C5-N5-C4-N6  | -178.71(18) | N10-N6-C4-N5 | 176.39(19) |
| C5-N5-C4-N7  | -0.8(3)     | N10-N6-C4-N7 | -0.6(4)    |
| N4-N5-C5-N8  | -177.2(2)   | C3-N6-C4-N5  | 0.1(2)     |
| N4-N5-C5-N9  | -2.9(4)     | C3-N6-C4-N7  | -176.9(3)  |
| C4-N5-C5-N8  | 0.4(2)      | C4-N7-N8-C5  | -0.5(2)    |
| C4-N5-C5-N9  | 174.7(2)    | N8-N7-C4-N5  | 0.8(2)     |
| N10-N6-C3-N4 | -175.7(2)   | C4-N6-C3-N4  | 0.1(3)     |
| N10-N6-C3-C2 | 4.5(4)      |              |            |

**Table S10** Hydrogen bonds of compound **7**

| D-H...A       | d(D-H)/Å | d(H...A)/ Å | d(D...A)/ Å | <(DHA)/ ° |
|---------------|----------|-------------|-------------|-----------|
| N2-H2A...N7   | 0.90(3)  | 2.12(3)     | 2.988(3)    | 163(2)    |
| N2-H2B...N4   | 0.89(3)  | 2.38(3)     | 2.980(3)    | 125(2)    |
| N9-H9A...N10  | 0.8800   | 2.4100      | 3.230(3)    | 155.00    |
| N9-H9B...N8   | 0.8800   | 2.2100      | 3.063(2)    | 163.00    |
| N10-H10A...N3 | 0.8800   | 2.4900      | 3.219(3)    | 141.00    |
| N10-H10B...N9 | 0.8800   | 2.5800      | 3.298(3)    | 139.00    |

**Table S11** Bond distance of compound **11**·H<sub>2</sub>O

| parameter | Å          | parameter | Å        |
|-----------|------------|-----------|----------|
| O5-N8     | 1.3592(18) | N6-N7     | 1.404(2) |
| O5-N9     | 1.400(2)   | N6-C2     | 1.363(2) |
| O2-N11    | 1.2551(19) | N6-C3     | 1.388(2) |
| O3-N11    | 1.250(2)   | N8-C4     | 1.306(2) |

|        |            |           |          |
|--------|------------|-----------|----------|
| O4-N11 | 1.2288(19) | N9-C5     | 1.311(2) |
| O1-H1A | 0.8700     | N10 -C5   | 1.352(2) |
| O1-H1B | 0.83(3)    | N1-H1     | 0.93(2)  |
| N1-N2  | 1.409(2)   | N4-H4A    | 0.90(2)  |
| N1 -C1 | 1.334(2)   | N4-H4B    | 0.88(2)  |
| N2-C2  | 1.2985(19) | N7-H7B    | 0.92(2)  |
| N3-N5  | 1.3871(17) | N7-H7A    | 0.88(2)  |
| N3-C2  | 1.358(2)   | N10-H10B  | 0.8800   |
| N3-C1  | 1.3640(19) | N10 -H10A | 0.8800   |
| N4 -C1 | 1.318(2)   | C3-C4     | 1.453(2) |
| N5 -C3 | 1.313(2)   | C4 -C5    | 1.440(2) |

**Table S12** Bond angle of compound **11**•H<sub>2</sub>O

| parameter   | °          | parameter      | °          |
|-------------|------------|----------------|------------|
| N8-O5-N9    | 111.28(12) | C5-N10-H10B    | 109.00     |
| H1A-O1-H1B  | 109.00     | H10A-N10 -H10B | 109.00     |
| N2-N1-C1    | 114.74(12) | C5-N10-H10A    | 109.00     |
| N1-N2-C2    | 100.01(12) | O2-N11-O4      | 120.54(16) |
| N5-N3-C2    | 113.42(12) | O3 -N11-O4     | 122.30(16) |
| C1-N3-C2    | 107.35(12) | O2 -N11-O3     | 117.13(14) |
| N5-N3-C1    | 139.22(14) | N1 -C1-N3      | 103.26(13) |
| N3-N5 -C3   | 101.74(12) | N1-C1-N4       | 129.85(14) |
| N7 -N6 -C3  | 131.47(13) | N3 -C1-N4      | 126.82(14) |
| C2-N6 -C3   | 105.84(13) | N2-C2-N3       | 114.64(13) |
| N7-N6-C2    | 122.69(13) | N2-C2-N6       | 140.29(14) |
| O5-N8-C4    | 105.73(13) | N3-C2 -N6      | 105.06(12) |
| O5-N9-C5    | 105.63(12) | N5-C3-N6       | 113.93(13) |
| C1-N1-H1    | 129.3(14)  | N5-C3 -C4      | 122.28(13) |
| N2-N1-H1    | 116.0(14)  | N6-C3 -C4      | 123.79(13) |
| C1 -N4-H4A  | 117.7(14)  | N8-C4-C3       | 121.71(13) |
| C1-N4-H4B   | 119.7(15)  | N8-C4-C5       | 109.71(13) |
| H4A-N4 -H4B | 122(2)     | C3-C4-C5       | 128.58(13) |
| N6-N7-H7A   | 108.5(15)  | N9-C5-N10      | 124.12(15) |
| N6-N7-H7B   | 107.8(14)  | N9-C5-C4       | 107.65(13) |
| H7A-N7-H7B  | 109(2)     | N10 -C5-C4     | 128.14(14) |

**Table S13** Torsion Angles compound **11**•H<sub>2</sub>O

| parameter     | °           | parameter     | °           |
|---------------|-------------|---------------|-------------|
| N9-O5-N8-C4   | -0.20(18)   | O5-N8 -C4 -C5 | 0.21(18)    |
| N8-O5-N9-C5   | 0.11(17)    | O5-N9-C5-N10  | 176.86(15)  |
| C1-N1-N2 -C2  | -0.03(18)   | O5 -N9 -C5-C4 | 0.03(17)    |
| N2 -N1-C1 -N3 | -0.36(17)   | N5 -C3-C4-N8  | -177.10(15) |
| N2-N1-C1-N4   | -177.51(15) | N5-C3-C4-C5   | 3.7(3)      |

|              |             |                |             |
|--------------|-------------|----------------|-------------|
| N1-N2 -C -N3 | 0.42(17)    | N6-C3 -C4-N8   | 3.8(2)      |
| N1-N2-C2 -N6 | -177.9(2)   | N6-C3-C4-C5    | -175.40(15) |
| C1-N3-N5-C3  | -178.21(18) | N8-C4-C5-N9    | -0.16(19)   |
| C2-N3 -N5-C3 | 0.69(17)    | N8 -C4-C5-N10  | -176.82(17) |
| N5-N3-C1-N1  | 179.53(17)  | C3-C4-C5-N9    | 179.13(16)  |
| N5-N3-C1 -N4 | -3.2(3)     | C3-C4-C5 -N10  | 2.5(3)      |
| C2-N3-C1-N1  | 0.58(16)    | C2 -N6 -C3 -N5 | -0.59(18)   |
| C2-N3-C1-N4  | 177.85(15)  | C2-N6-C3-C4    | 178.57(14)  |
| N5-N3-C2 -N2 | -179.92(14) | O5 -N8 -C4 -C3 | -179.13(14) |
| N5-N3-C2 -N6 | -1.06(17)   | N7 -N6 -C2 -N3 | 179.90(15)  |
| C1-N3-C2-N2  | -0.67(18)   | C3-N6-C2 -N2   | 179.3(2)    |
| C1-N3-C2-N6  | 178.19(12)  | C3-N6 -C2 -N3  | 0.95(16)    |
| N3-N5-C3-N6  | -0.04(17)   | N7-N6-C3 -N5   | -179.41(16) |
| N3-N5-C3 -C4 | -179.22(14) | N7-N6-C3-C4    | -0.3(3)     |
| N7 -N6-C2-N2 | -1.7(3)     |                |             |

**Table S14** Hydrogen bonds compound **11**•H<sub>2</sub>O

| D-H...A         | d(D-H)/Å | d(H...A)/ Å | d(D...A)/ Å | <(DHA)/ ° |
|-----------------|----------|-------------|-------------|-----------|
| N1-H1...O1      | 0.93(2)  | 1.95(2)     | 2.746(19)   | 143.8(19) |
| N1- H1...O3     | 0.93(2)  | 2.18(2)     | 2.847(2)    | 128.5(18) |
| O1-H1A...O2     | 0.8700   | 1.8900      | 2.729(2)    | 162.00    |
| O1-H1B...N9     | 0.83(3)  | 2.12(3)     | 2.924(19)   | 164(2)    |
| N4- H4A...O2    | 0.90(2)  | 2.01(2)     | 2.895(19)   | 169.1(18) |
| N4-H4A...O3     | 0.90(2)  | 2.42(2)     | 3.101(2)    | 132.7(18) |
| N4- H4B...N7    | 0.88(2)  | 2.08(2)     | 2.962(2)    | 175.5(19) |
| N7-H7A...O3     | 0.88(2)  | 2.00(2)     | 2.863(2)    | 166(2)    |
| N7-H7B...O1     | 0.92(2)  | 2.07(2)     | 2.964(2)    | 161.9(19) |
| N10-H10A... O4  | 0.8800   | 2.2600      | 3.124(2)    | 167.00    |
| N10- H10B ...N5 | 0.8800   | 2.5500      | 3.051(19)   | 117.00    |
| N10-H10B...O3   | 0.8800   | 2.5500      | 3.398(2)    | 163.00    |

### 3. $^1\text{H}$ and $^{13}\text{C}$ NMR spectra of new compounds

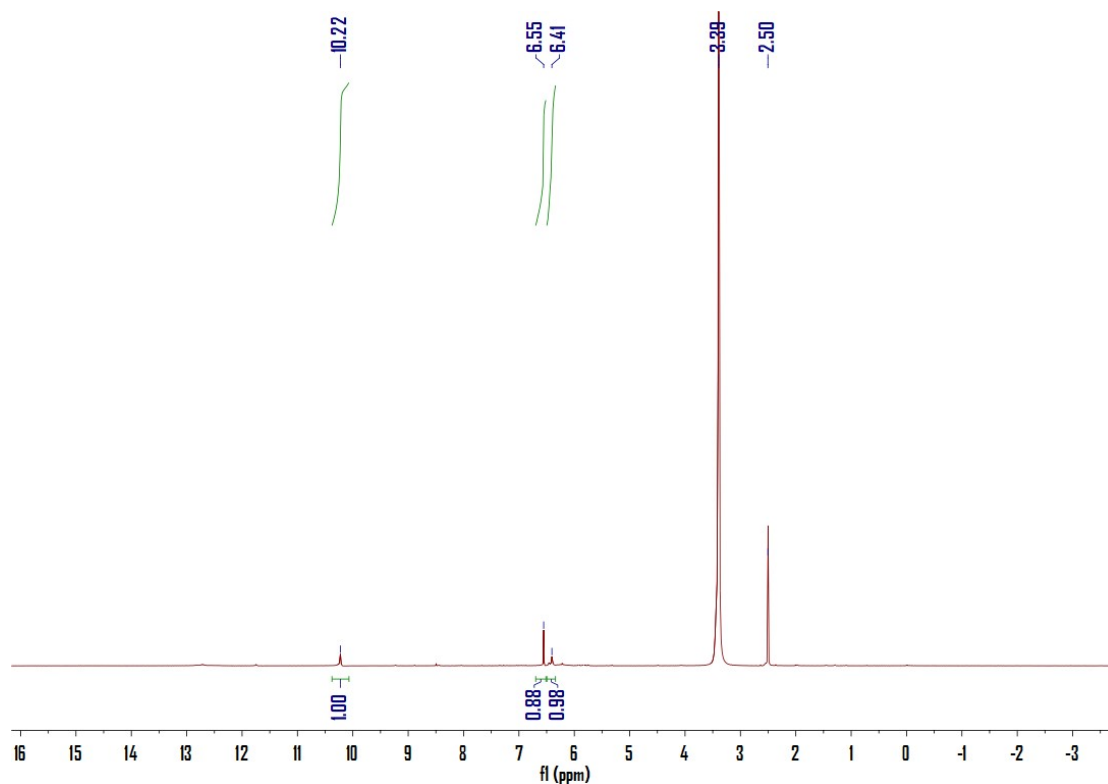

Figure S1  $^1\text{H}$  NMR spectra (500MHz) of **2** in  $[\text{D}_6]$  DMSO at 25 °C.

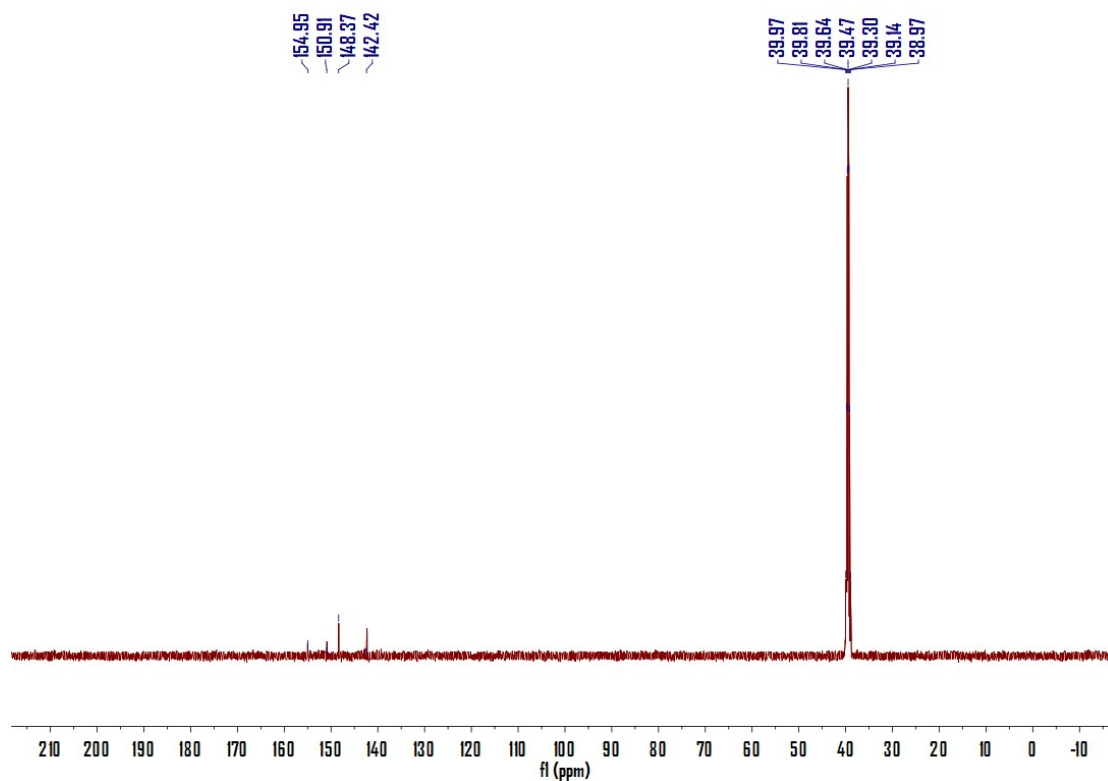

Figure S2  $^{13}\text{C}$  NMR spectra (125 MHz) of **2** in  $[\text{D}_6]$  DMSO at 25 °C.

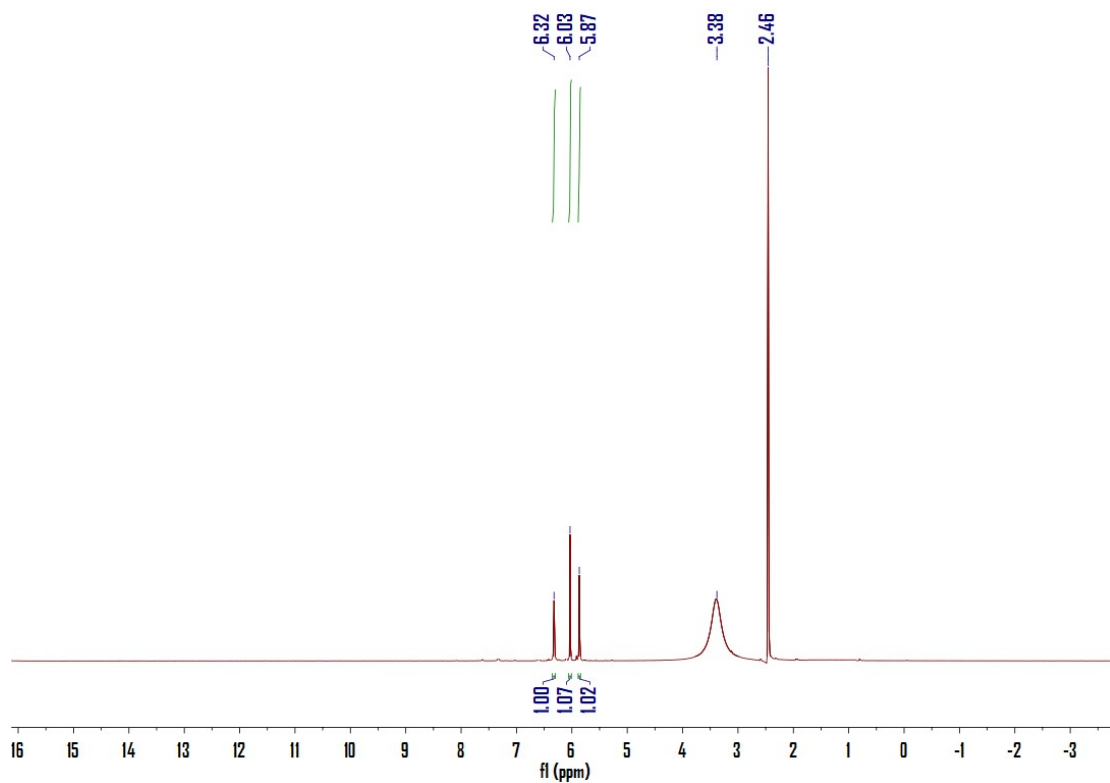

Figure S3  $^1\text{H}$  NMR spectra (500MHz) of **3** in  $[\text{D}_6]$  DMSO at 25 °C.

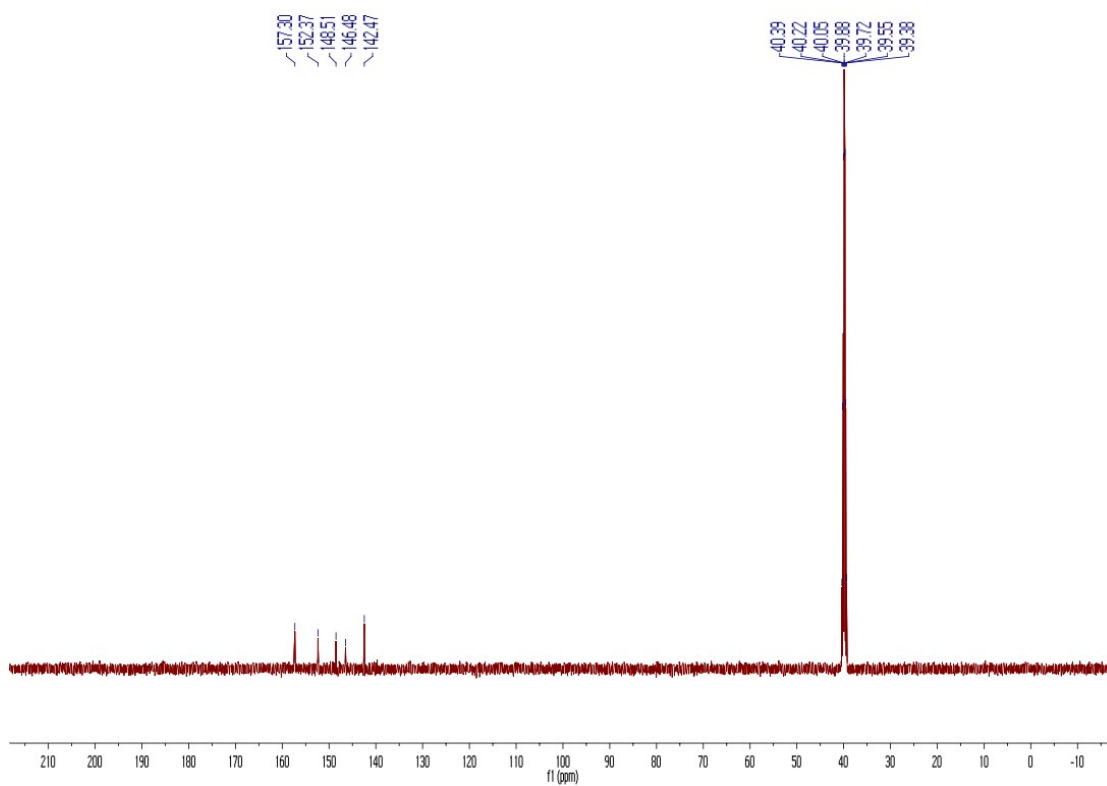

Figure S4  $^{13}\text{C}$  NMR spectra (125 MHz) of **3** in  $[\text{D}_6]$  DMSO at 25 °C.

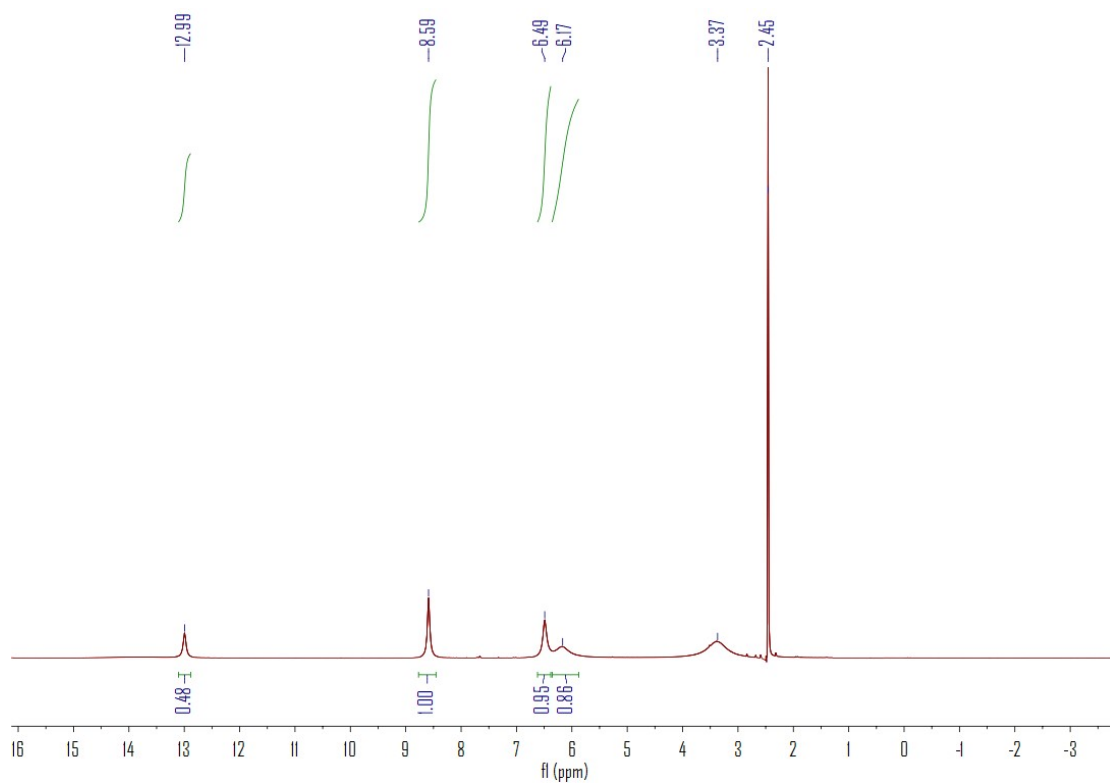

Figure S5  $^1\text{H}$  NMR spectra (500MHz) of **4** in  $[\text{D}_6]$  DMSO at 25 °C.

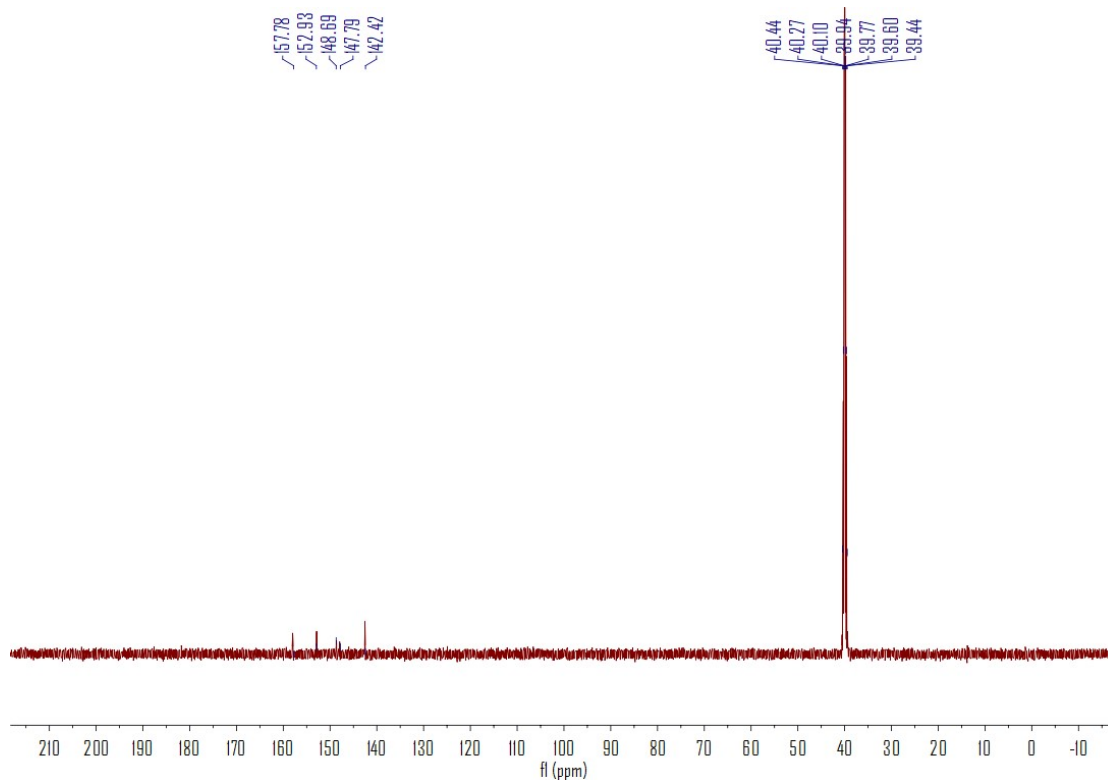

Figure S6  $^{13}\text{C}$  NMR spectra (125 MHz) of **4** in  $[\text{D}_6]$  DMSO at 25 °C.

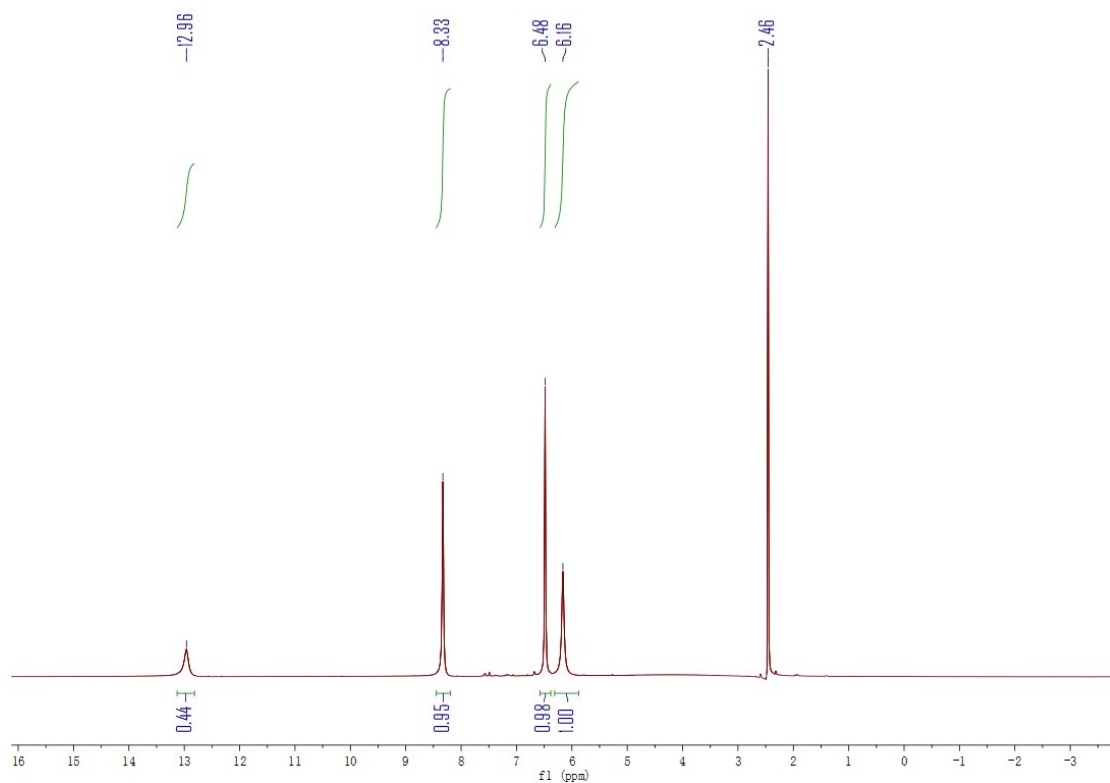

Figure S7  $^1\text{H}$  NMR spectra (500MHz) of **5** in  $[\text{D}_6]$  DMSO at 25 °C.

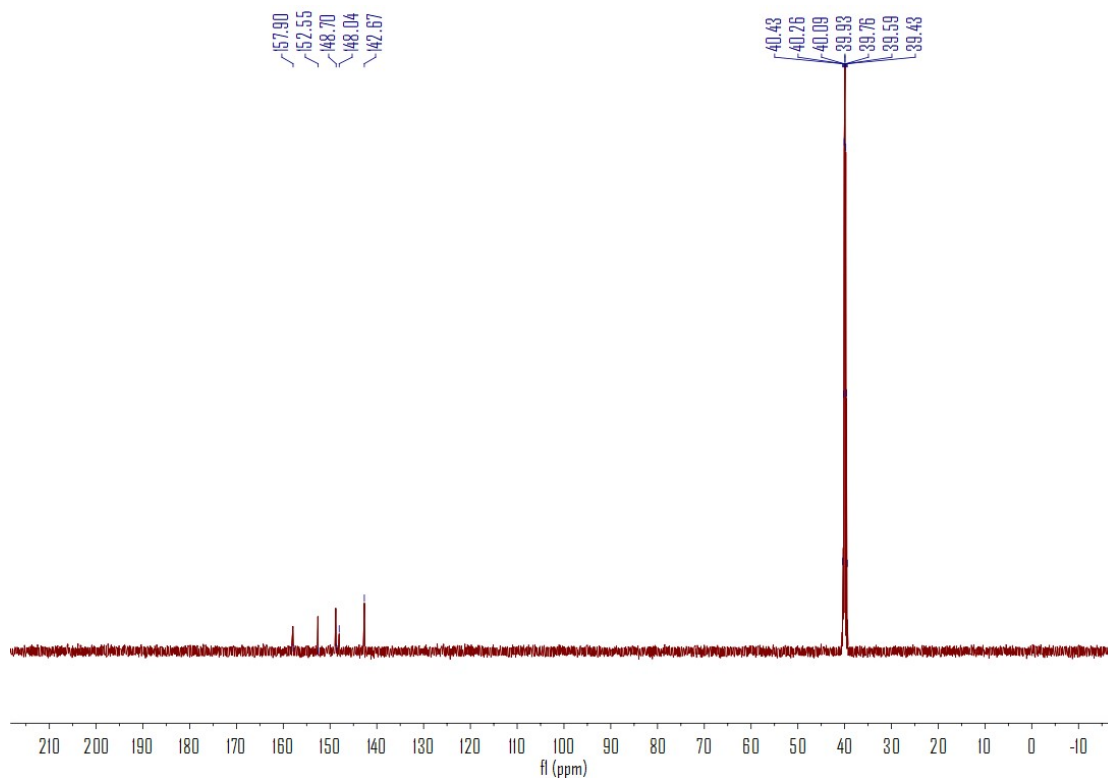

Figure S8  $^{13}\text{C}$  NMR spectra (125 MHz) of **5** in  $[\text{D}_6]$  DMSO at 25 °C.

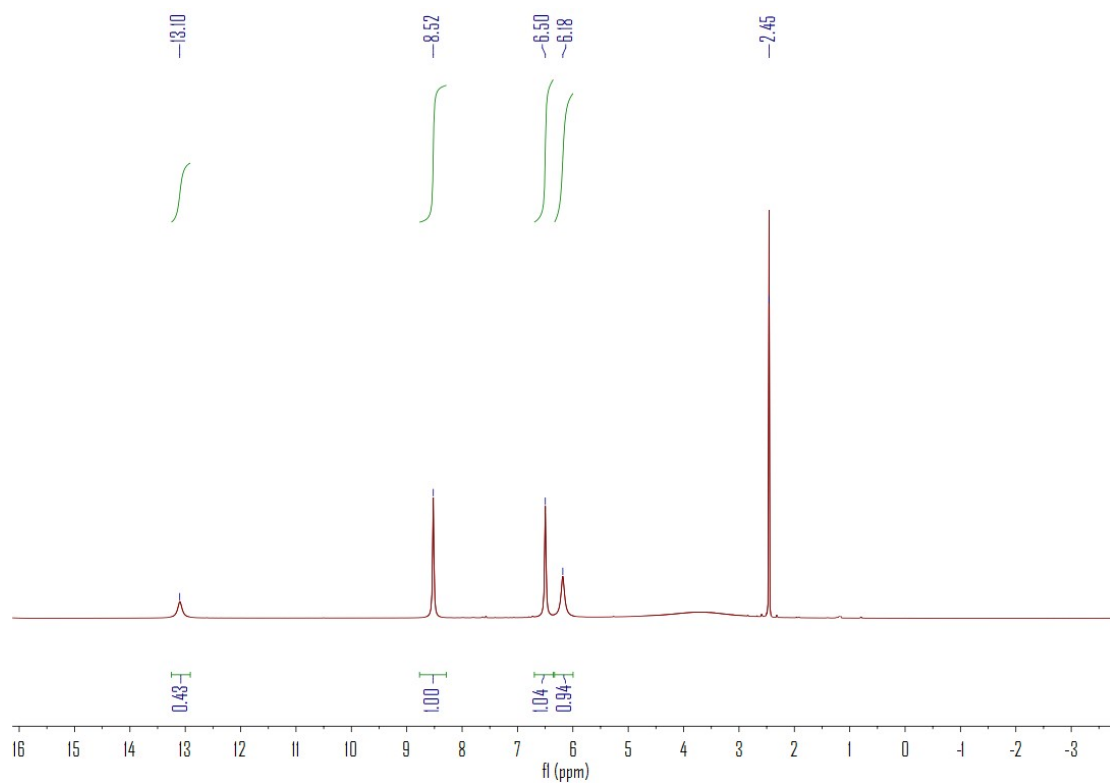

Figure S9  $^1\text{H}$  NMR spectra (500MHz) of **6** in  $[\text{D}_6]$  DMSO at 25 °C.

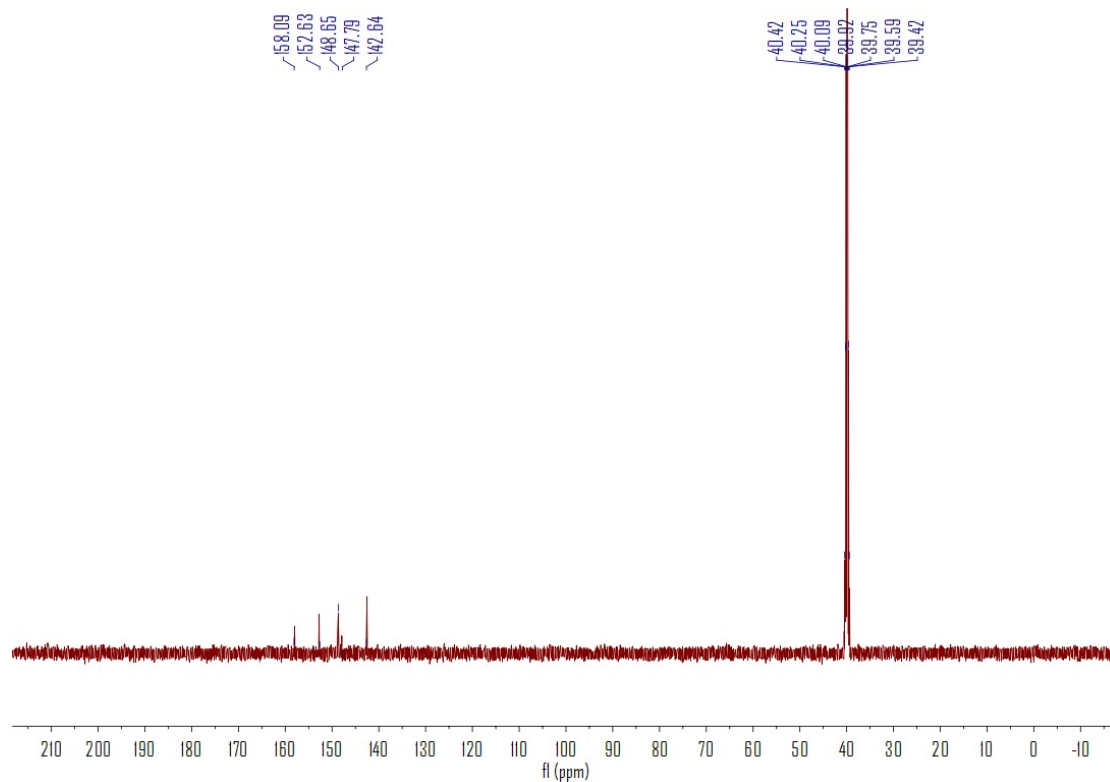

Figure S10  $^{13}\text{C}$  NMR spectra (125 MHz) of **6** in  $[\text{D}_6]$  DMSO at 25 °C.



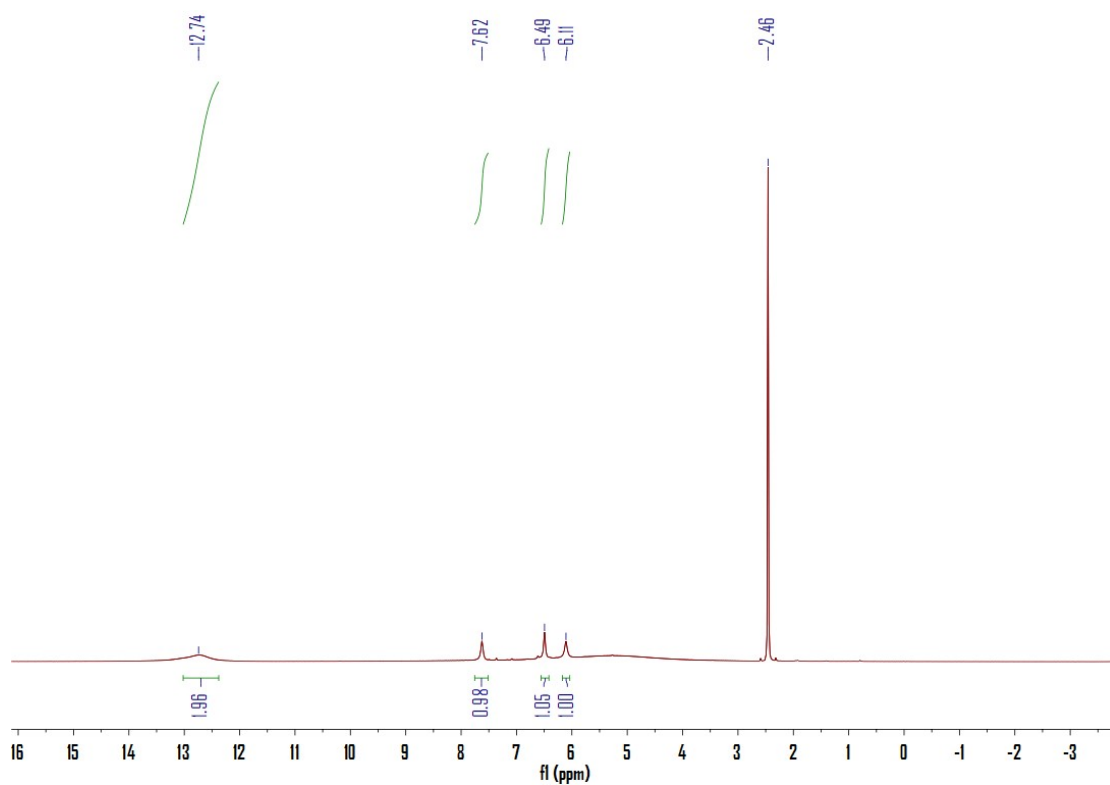

Figure S11  $^1\text{H}$  NMR spectra (500MHz) of **7** in  $[\text{D}_6]$  DMSO at 25 °C.

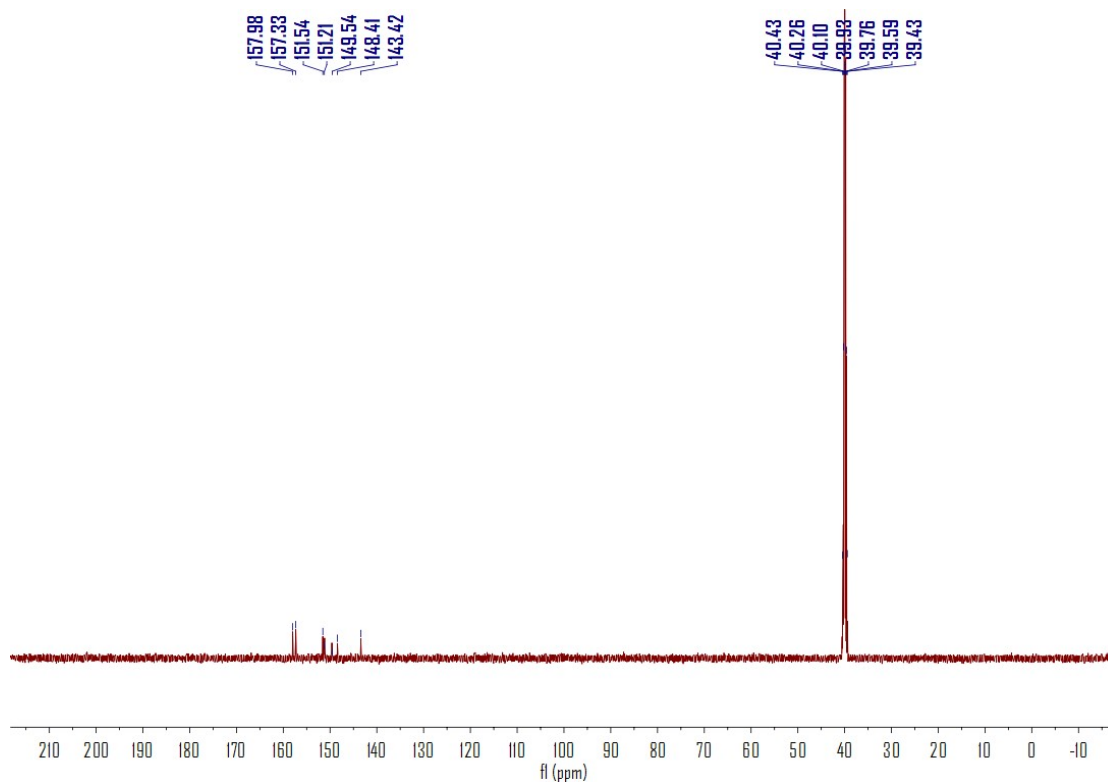

Figure S12  $^{13}\text{C}$  NMR spectra (125 MHz) of **7** in  $[\text{D}_6]$  DMSO at 25 °C.

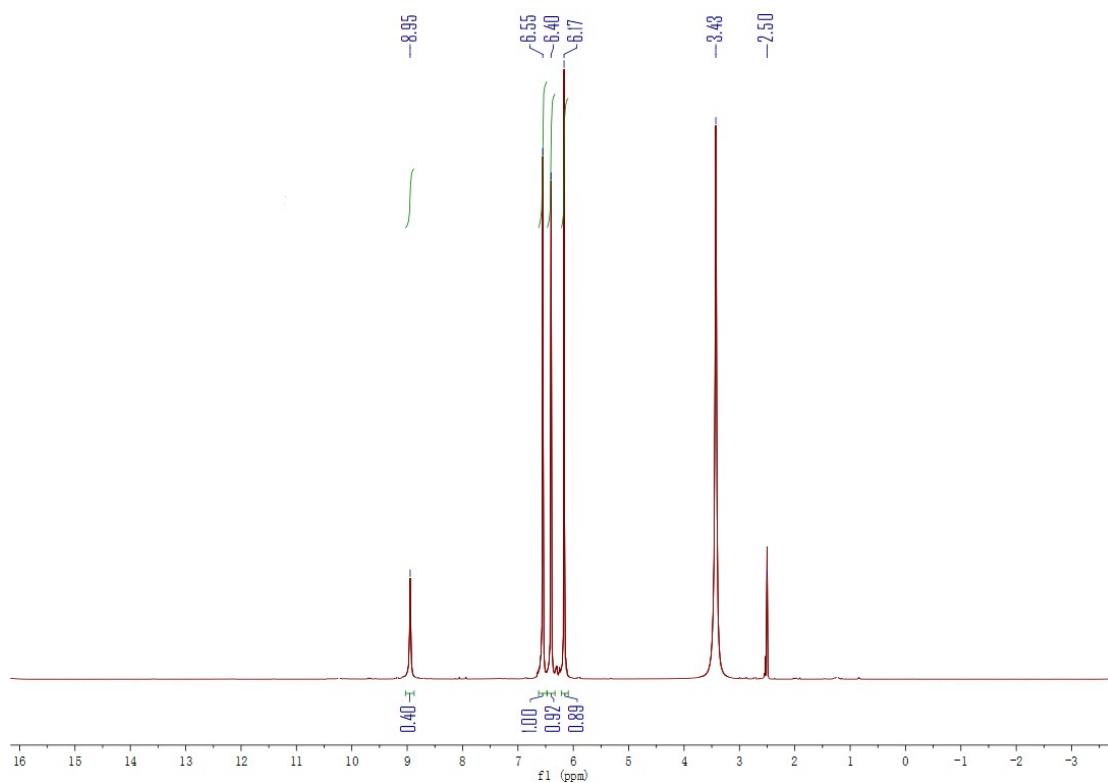

Figure S13  $^1\text{H}$  NMR spectra (500MHz) of **9** in  $[\text{D}_6]$  DMSO at 25 °C.

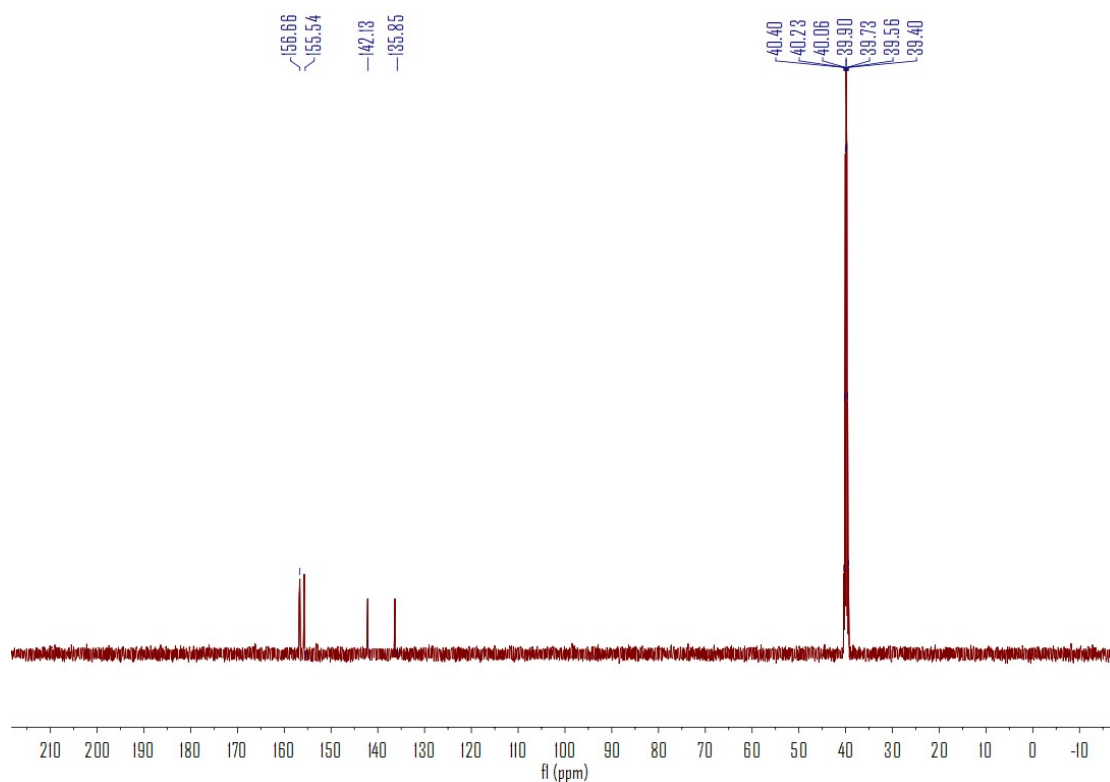

Figure S14  $^{13}\text{C}$  NMR spectra (125 MHz) of **9** in  $[\text{D}_6]$  DMSO at 25 °C.

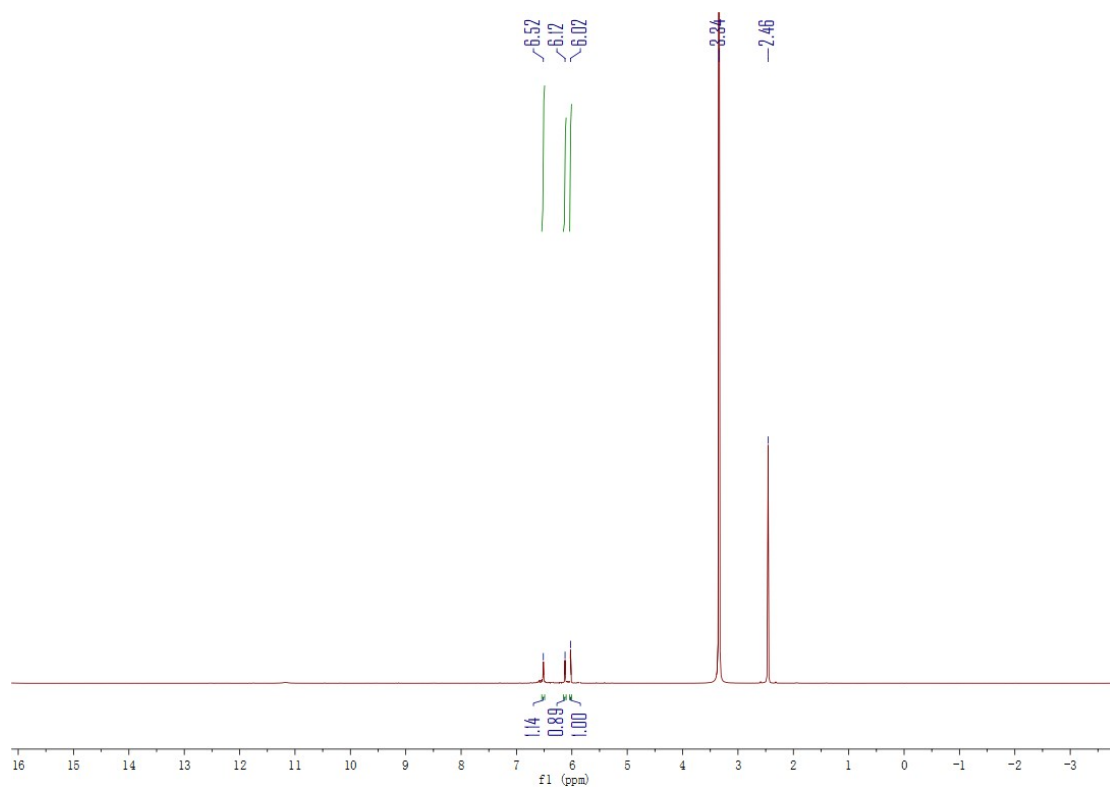

Figure S15  $^1\text{H}$  NMR spectra (500MHz) of **10** in  $[\text{D}_6]$  DMSO at 25 °C.

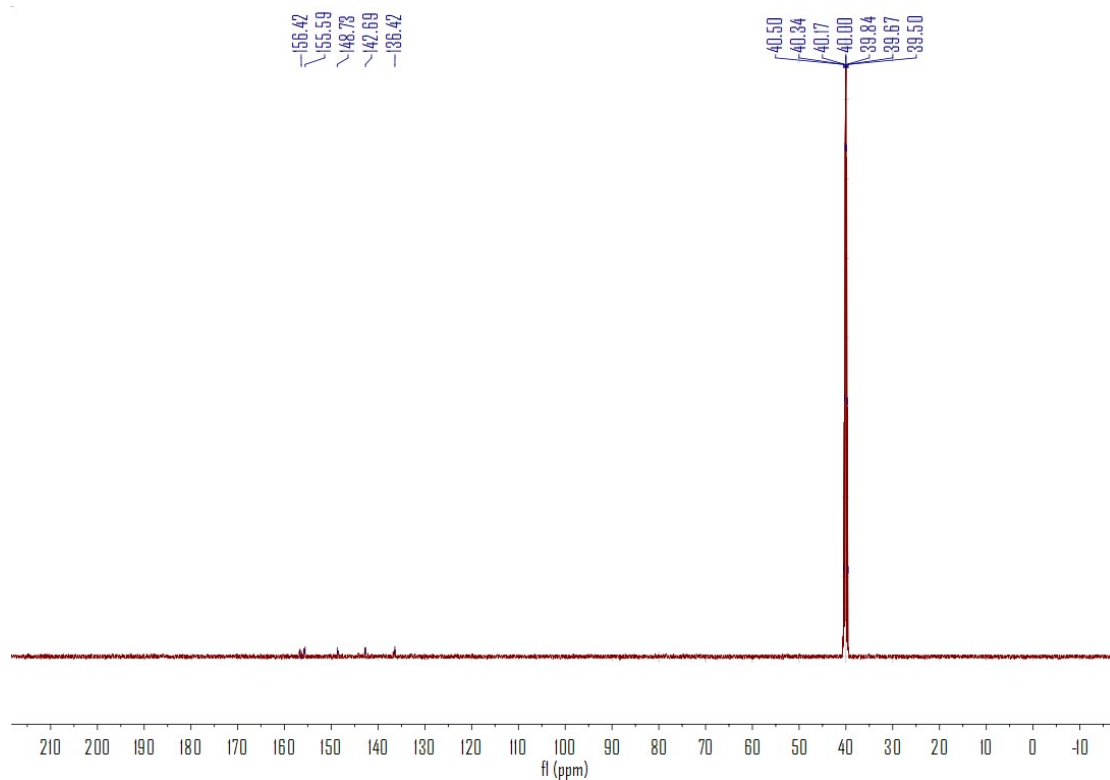

Figure S16  $^{13}\text{C}$  NMR spectra (125 MHz) of **10** in  $[\text{D}_6]$  DMSO at 25 °C.

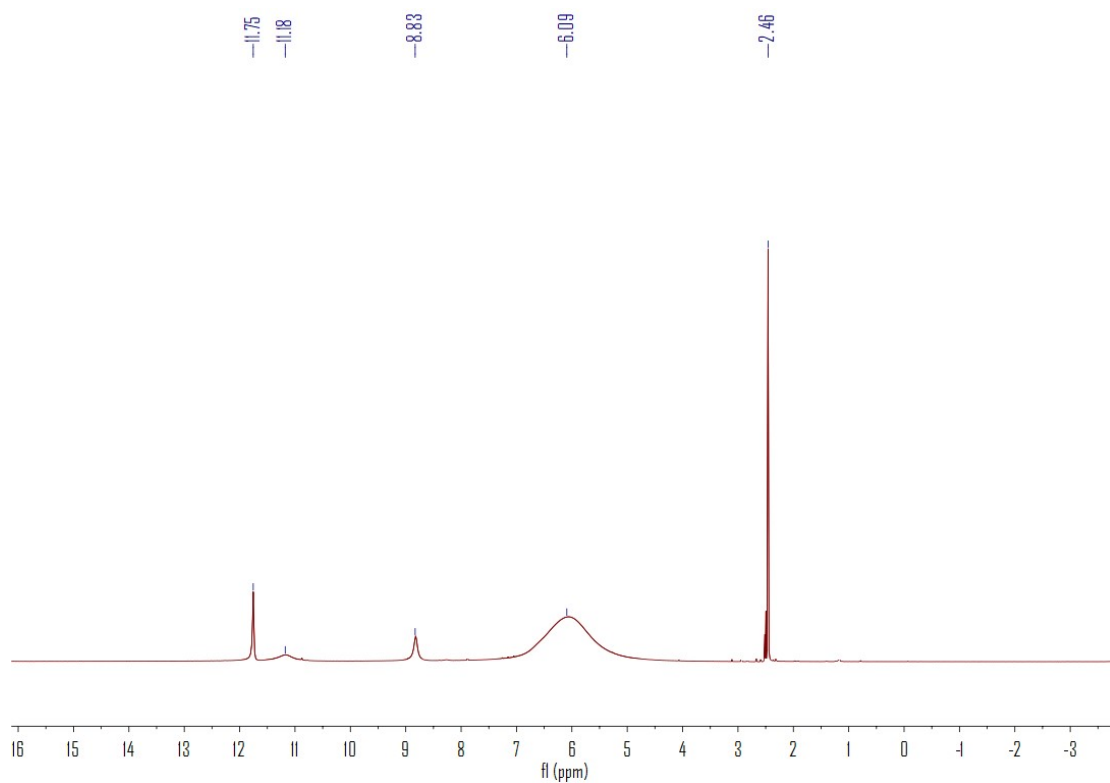

Figure S17  $^1\text{H}$  NMR spectra (500MHz) of **11** in  $[\text{D}_6]$  DMSO at 25 °C.

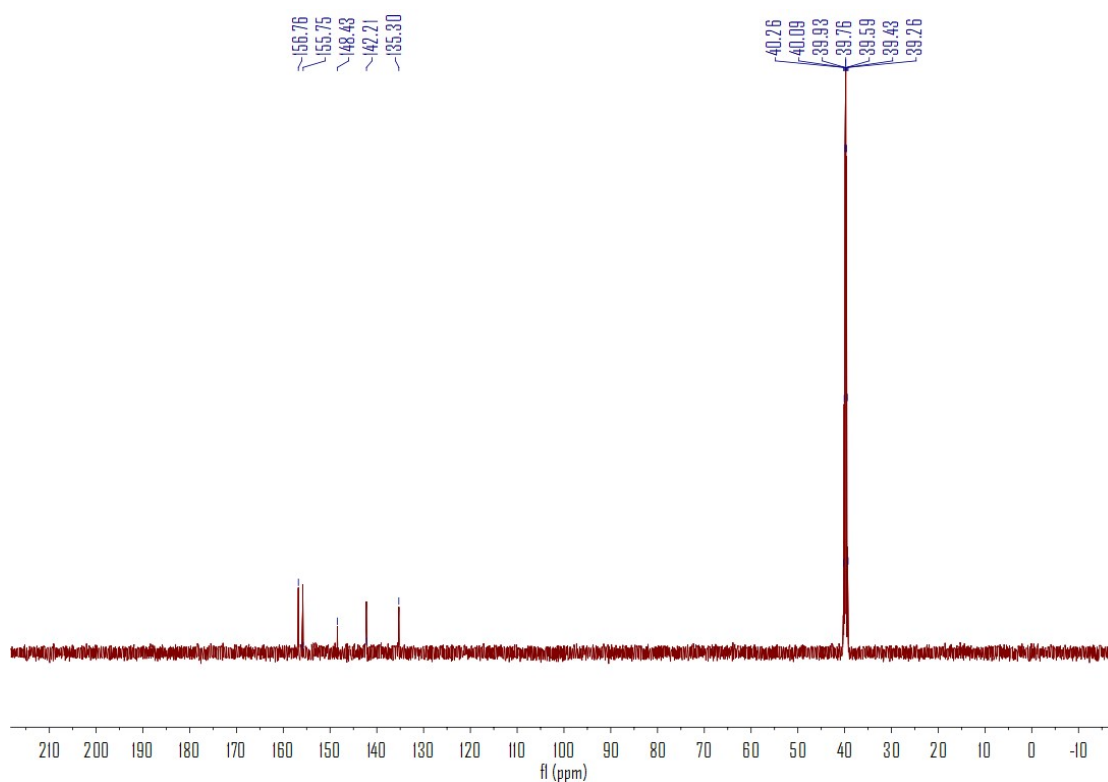

Figure S18  $^{13}\text{C}$  NMR spectra (125 MHz) of **11** in  $[\text{D}_6]$  DMSO at 25 °C.

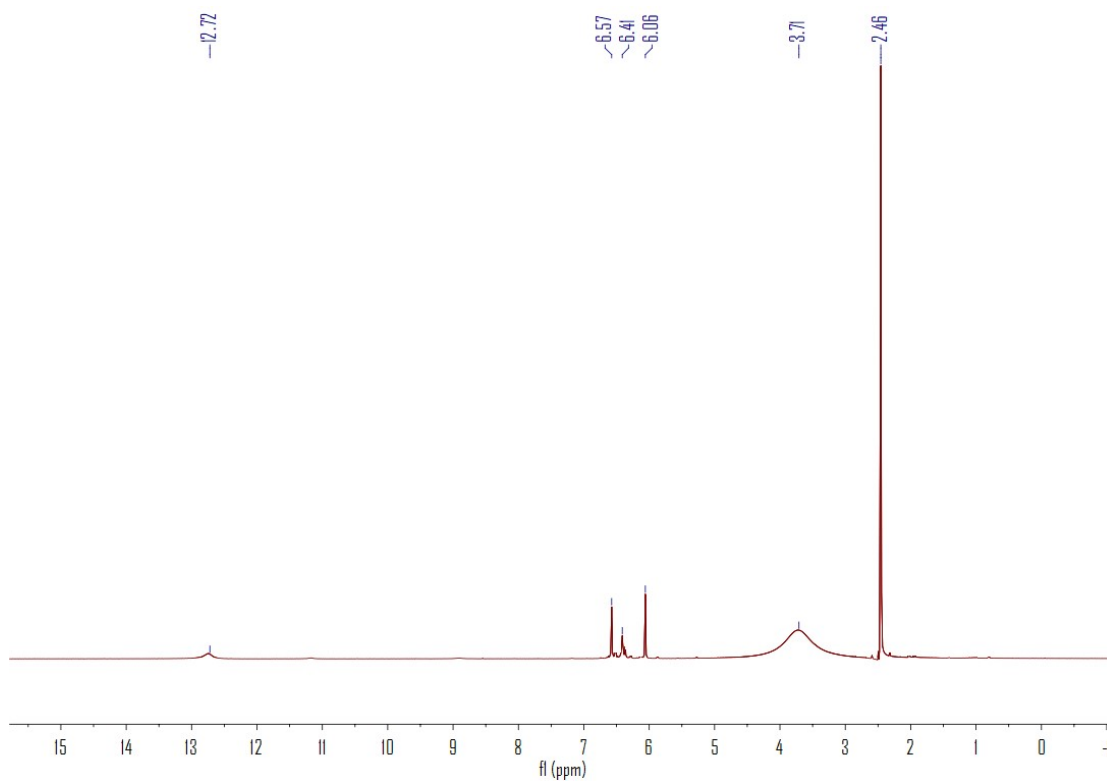

Figure S19  $^1\text{H}$  NMR spectra (500MHz) of **11** in  $[\text{D}_6]$  DMSO at 25 °C.

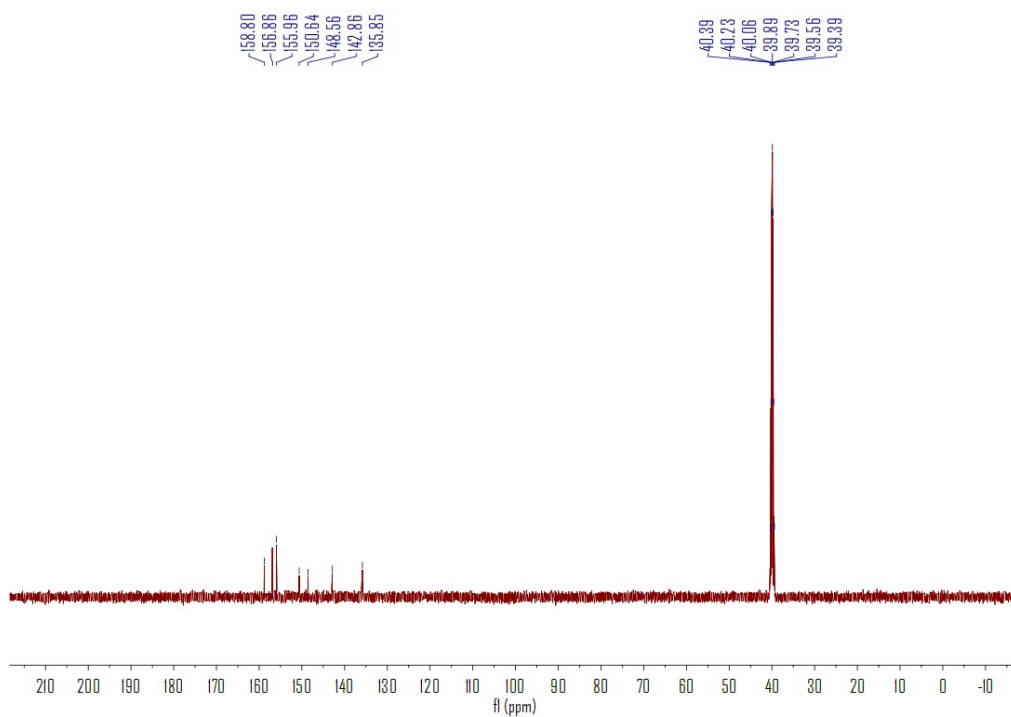

Figure S20  $^{13}\text{C}$  NMR spectra (125 MHz) of **11** in  $[\text{D}_6]$  DMSO at 25 °C.
